# Supplementary material for: CosinorPy: a python package for cosinor-based rhythmometry
Source: PubMed Central journal article supplement (PMC7597035; doi:10.1186/s12859-020-03830-w), 2020-10-29
Supplement: 12859_2020_3830_MOESM1_ESM.pdf [file 12859_2020_3830_MOESM1_ESM.pdf]

| test  | period | n_compon | p        | q        | p_reject | q_reject | RSS      | R2       | R2_adj   |
|-------|--------|----------|----------|----------|----------|----------|----------|----------|----------|
| test1 | 24     | 1        | 1.11E-16 | 1.48E-16 | 0.169409 | 0.254113 | 11.51215 | 0.784755 | 0.778776 |
| test1 | 24     | 2        | 1.11E-16 | 1.48E-16 | 0.102157 | 0.204313 | 11.38718 | 0.787092 | 0.774926 |
| test1 | 24     | 3        | 1.11E-16 | 1.48E-16 | 0.154183 | 0.254113 | 10.74565 | 0.799087 | 0.781359 |
| test2 | 24     | 1        | 2.22E-16 | 2.66E-16 | 0.247727 | 0.330303 | 19.73816 | 0.63115  | 0.620904 |
| test2 | 24     | 2        | 3.44E-15 | 3.75E-15 | 0.305034 | 0.366041 | 18.87176 | 0.647341 | 0.627189 |
| test2 | 24     | 3        | 2.33E-14 | 2.33E-14 | 0.397668 | 0.433819 | 18.0005  | 0.663622 | 0.633942 |
| test3 | 24     | 1        | 1.11E-16 | 1.48E-16 | 2.73E-13 | 1.64E-12 | 66.22364 | 0.51881  | 0.512127 |
| test3 | 24     | 2        | 1.11E-16 | 1.48E-16 | 3.04E-05 | 9.11E-05 | 44.88016 | 0.673895 | 0.664709 |
| test3 | 24     | 3        | 1.11E-16 | 1.48E-16 | 0.054029 | 0.129669 | 36.58674 | 0.734156 | 0.722763 |
| test4 | 24     | 1        | 1.11E-16 | 1.48E-16 | 3.99E-14 | 4.78E-13 | 57.21331 | 0.60059  | 0.595042 |
| test4 | 24     | 2        | 1.11E-16 | 1.48E-16 | 4.64E-06 | 1.86E-05 | 38.95773 | 0.728033 | 0.720372 |
| test4 | 24     | 3        | 1.11E-16 | 1.48E-16 | 0.69187  | 0.69187  | 27.47315 | 0.808208 | 0.799988 |

| log-likeliho | period(est) | amplitude | acrophase | mesor    | ME       | resid_SE |
|--------------|-------------|-----------|-----------|----------|----------|----------|
| -36.1422     | 24          | 1.039764  | -6.13224  | 0.002031 | 0.797114 | 0.399864 |
| -35.7329     | 24          | 1.047858  | -6.02741  | -0.02021 | 0.804413 | 0.403329 |
| -33.5584     | 24          | 1.074762  | -5.76535  | 0.021674 | 0.793244 | 0.397523 |
| -56.3604     | 24          | 0.93211   | -3.19715  | -0.02253 | 1.043747 | 0.523585 |
| -54.6771     | 24          | 0.974877  | -2.9875   | 0.04405  | 1.035565 | 0.519227 |
| -52.9046     | 24          | 0.944199  | -2.67303  | 0.008264 | 1.026675 | 0.514503 |
| -149.975     | 24          | 0.976145  | -0.05241  | -0.00046 | 1.340413 | 0.678149 |
| -121.381     | 24          | 1.121927  | -0.02621  | 0.356556 | 1.111343 | 0.56219  |
| -106.364     | 24          | 1.276843  | -0.05241  | 0.503533 | 1.010686 | 0.511208 |
| -139.226     | 24          | 1.071631  | -3.03991  | -0.04253 | 1.245893 | 0.630329 |
| -110.979     | 24          | 1.209467  | -2.1227   | -0.36488 | 1.035423 | 0.523784 |
| -85.3081     | 24          | 1.431859  | -3.03991  | -0.49742 | 0.875808 | 0.442986 |
