# Supplementary material for: CosinorPy: a python package for cosinor-based rhythmometry
Source: PubMed Central journal article supplement (PMC7597035; doi:10.1186/s12859-020-03830-w), 2020-10-29
Supplement: 12859_2020_3830_MOESM2_ESM.pdf [file 12859_2020_3830_MOESM2_ESM.pdf]

| test  | p        | q        | amplitude | p(amplitud | q(amplitud | acrophase | p(acrophas | q(acrophas | acrophase |
|-------|----------|----------|-----------|------------|------------|-----------|------------|------------|-----------|
| test1 | 9.67E-25 | 1.93E-24 | 1.039766  | 4.96E-59   | 1.98E-58   | 0.141459  | 0          | 0          | -0.54033  |
| test2 | 2.55E-16 | 2.55E-16 | 0.932111  | 1.26E-28   | 1.26E-28   | 3.094333  | 2.48E-254  | 3.30E-254  | -11.8195  |
| test3 | 1.34E-23 | 1.79E-23 | 0.976146  | 1.23E-35   | 1.64E-35   | 6.240175  | 0.599345   | 0.599345   | -23.8357  |
| test4 | 2.01E-29 | 8.02E-29 | 1.071633  | 5.17E-49   | 1.03E-48   | 3.233446  | 0          | 0          | -12.3509  |

period

24

24

24

24
