# Supplementary material for: CosinorPy: a python package for cosinor-based rhythmometry
Source: PubMed Central journal article supplement (PMC7597035; doi:10.1186/s12859-020-03830-w), 2020-10-29
Supplement: 12859_2020_3830_MOESM3_ESM.pdf [file 12859_2020_3830_MOESM3_ESM.pdf]

| test         | p        | q        | amplitude: | p(amplitud | q(amplitud | amplitude: | p(amplitud | q(amplitud | d_amplitud |
|--------------|----------|----------|------------|------------|------------|------------|------------|------------|------------|
| test1 vs. te | 7.11E-37 | 7.11E-37 | 1.039766   | 5.81E-44   | 1.16E-43   | 0.932111   | 1.02E-35   | 1.02E-35   | -0.10766   |
| test3 vs. te | 1.64E-49 | 3.29E-49 | 0.976146   | 4.11E-38   | 4.11E-38   | 1.071633   | 1.45E-45   | 2.90E-45   | 0.095487   |

| p(d_amplit | q(d_amplit | acrophase: | p(acrophas | q(acrophas | acrophase: | p(acrophas | q(acrophas | d_acropha | p(d_acropt |
|------------|------------|------------|------------|------------|------------|------------|------------|-----------|------------|
| 0.308457   | 0.372013   | -6.14173   | 0          | 0          | -3.18885   | 0          | 0          | 2.952874  | 1.16E-153  |
| 0.372013   | 0.372013   | -0.04301   | 0.586319   | 0.586319   | -3.04974   | 0          | 0          | -3.00673  | 4.81E-174  |

q(d\_acrop| period

1.16E-153      24

9.62E-174      24
