# Supplementary material for: CosinorPy: a python package for cosinor-based rhythmometry
Source: PubMed Central journal article supplement (PMC7597035; doi:10.1186/s12859-020-03830-w), 2020-10-29
Supplement: 12859_2020_3830_MOESM4_ESM.pdf [file 12859_2020_3830_MOESM4_ESM.pdf]

| test  | period | n_compon | p        | q        | p_reject | q_reject | RSS      | period(est) | amplitude |
|-------|--------|----------|----------|----------|----------|----------|----------|-------------|-----------|
| test4 | 24     | 1        | 1.11E-16 | 1.48E-16 | 3.99E-14 | 4.78E-13 | 57.21331 | 24          | 1.071631  |
| test4 | 24     | 2        | 1.11E-16 | 1.48E-16 | 4.64E-06 | 1.86E-05 | 38.95773 | 24          | 1.209467  |
| test4 | 24     | 3        | 1.11E-16 | 1.48E-16 | 0.69187  | 0.69187  | 27.47315 | 24          | 1.431859  |
| test2 | 24     | 1        | 2.22E-16 | 2.66E-16 | 0.247727 | 0.330303 | 19.73816 | 24          | 0.93211   |
| test2 | 24     | 2        | 3.44E-15 | 3.75E-15 | 0.305034 | 0.366041 | 18.87176 | 24          | 0.974877  |
| test2 | 24     | 3        | 2.33E-14 | 2.33E-14 | 0.397668 | 0.433819 | 18.0005  | 24          | 0.944199  |
| test1 | 24     | 1        | 1.11E-16 | 1.48E-16 | 0.169409 | 0.254113 | 11.51215 | 24          | 1.039764  |
| test1 | 24     | 2        | 1.11E-16 | 1.48E-16 | 0.102157 | 0.204313 | 11.38718 | 24          | 1.047858  |
| test1 | 24     | 3        | 1.11E-16 | 1.48E-16 | 0.154183 | 0.254113 | 10.74565 | 24          | 1.074762  |
| test3 | 24     | 1        | 1.11E-16 | 1.48E-16 | 2.73E-13 | 1.64E-12 | 66.22364 | 24          | 0.976145  |
| test3 | 24     | 2        | 1.11E-16 | 1.48E-16 | 3.04E-05 | 9.11E-05 | 44.88016 | 24          | 1.121927  |
| test3 | 24     | 3        | 1.11E-16 | 1.48E-16 | 0.054029 | 0.129669 | 36.58674 | 24          | 1.276843  |

| acrophase | mesor    | ME       | resid_SE |
|-----------|----------|----------|----------|
| -3.03991  | -0.04253 | 1.245893 | 0.630329 |
| -2.1227   | -0.36488 | 1.035423 | 0.523784 |
| -3.03991  | -0.49742 | 0.875808 | 0.442986 |
| -3.19715  | -0.02253 | 1.043747 | 0.523585 |
| -2.9875   | 0.04405  | 1.035565 | 0.519227 |
| -2.67303  | 0.008264 | 1.026675 | 0.514503 |
| -6.13224  | 0.002031 | 0.797114 | 0.399864 |
| -6.02741  | -0.02021 | 0.804413 | 0.403329 |
| -5.76535  | 0.021674 | 0.793244 | 0.397523 |
| -0.05241  | -0.00046 | 1.340413 | 0.678149 |
| -0.02621  | 0.356556 | 1.111343 | 0.56219  |
| -0.05241  | 0.503533 | 1.010686 | 0.511208 |
