# Supplementary material for: CosinorPy: a python package for cosinor-based rhythmometry
Source: PubMed Central journal article supplement (PMC7597035; doi:10.1186/s12859-020-03830-w), 2020-10-29
Supplement: 12859_2020_3830_MOESM5_ESM.pdf [file 12859_2020_3830_MOESM5_ESM.pdf]

| test  | p        | q        | amplitude | LB(amplitu | UB(amplitu | acrophase | LB(acrophæ | UB(acroph | acrophase[ |
|-------|----------|----------|-----------|------------|------------|-----------|------------|-----------|------------|
| test1 | 0.000244 | 0.000489 | 1.039766  | 0.972793   | 1.10674    | -6.14173  | -6.33315   | -5.97301  | 23.45967   |
| test2 | 0.149442 | 0.149442 | 0.932111  | 0.496716   | 1.367505   | -3.18885  | -3.25285   | -3.11186  | 12.18052   |
| test3 | 0.045682 | 0.060909 | 0.976146  | 0.838807   | 1.113485   | -0.04301  | -0.25405   | 0.159531  | 0.164287   |
| test4 | 0.000113 | 0.000453 | 1.071633  | 0.747364   | 1.395902   | -3.04974  | -3.27513   | -2.64511  | 11.64915   |

h]
