# Supplementary material for: CosinorPy: a python package for cosinor-based rhythmometry
Source: PubMed Central journal article supplement (PMC7597035; doi:10.1186/s12859-020-03830-w), 2020-10-29
Supplement: 12859_2020_3830_MOESM6_ESM.pdf [file 12859_2020_3830_MOESM6_ESM.pdf]

| test        | amplitude | amplitude | p(d_amplit | q(d_amplit | acrophase | acrophase | p(d_acroph | q(d_acrophase) |
|-------------|-----------|-----------|------------|------------|-----------|-----------|------------|----------------|
| test1 vs te | 1.039766  | 0.932111  | 0.26892    | 0.537841   | -6.14173  | -3.18885  | 1.82E-05   | 3.63E-05       |
| test3 vs te | 0.976146  | 1.071633  | 0.544973   | 0.544973   | -0.04301  | -3.04974  | 0.00012    | 0.00012        |
