# Supplementary material for: CosinorPy: a python package for cosinor-based rhythmometry
Source: PubMed Central journal article supplement (PMC7597035; doi:10.1186/s12859-020-03830-w), 2020-10-29
Supplement: 12859_2020_3830_MOESM7_ESM.pdf [file 12859_2020_3830_MOESM7_ESM.pdf]

| test  | p        | amplitude | p_amplitu | acrophase | p_acropha | acrophase_corrected |
|-------|----------|-----------|-----------|-----------|-----------|---------------------|
| test1 | 9.67E-25 | 1.039766  | 4.96E-59  | -0.14146  | 0.0272    | 0.141459            |
| test2 | 2.55E-16 | 0.932111  | 1.26E-28  | 0.04726   | 0.613667  | 3.094333            |
| test3 | 1.34E-23 | 0.976146  | 1.23E-35  | 0.04301   | 0.599345  | 6.240175            |
| test4 | 2.01E-29 | 1.071633  | 5.17E-49  | -0.09185  | 0.185075  | 3.233446            |
