# Supplementary material for: CosinorPy: a python package for cosinor-based rhythmometry
Source: PubMed Central journal article supplement (PMC7597035; doi:10.1186/s12859-020-03830-w), 2020-10-29
Supplement: 12859_2020_3830_MOESM8_ESM.pdf [file 12859_2020_3830_MOESM8_ESM.pdf]

| test         | p        | amplitude: | p_amplitud | amplitude: | p_amplitud | d_amplitud | p_d_ampli | acrophase: | p_acropha |
|--------------|----------|------------|------------|------------|------------|------------|-----------|------------|-----------|
| test1 vs. te | 7.11E-37 | 1.039766   | 5.81E-44   | 0.932111   | 1.02E-35   | -0.10766   | 0.308457  | -0.14146   | 0.057987  |
| test3 vs. te | 1.64E-49 | 0.976146   | 4.11E-38   | 1.071633   | 1.45E-45   | 0.095487   | 0.372013  | 0.04301    | 0.586319  |

acrophase: p\_acropha d\_acropha p\_d\_acrophase  
0.04726 0.570433 0.188719 0.091484  
-0.09185 0.201954 -0.13486 0.207119
