# Supplementary material for: CosinorPy: a python package for cosinor-based rhythmometry
Source: PubMed Central journal article supplement (PMC7597035; doi:10.1186/s12859-020-03830-w), 2020-10-29
Supplement: 12859_2020_3830_MOESM9_ESM.pdf [file 12859_2020_3830_MOESM9_ESM.pdf]

| test  | p        | amplitude | LB_amplitu | UB_amplitu | acrophase | LB_acroph | UB_acrophase |
|-------|----------|-----------|------------|------------|-----------|-----------|--------------|
| test1 | 0.000244 | 1.039766  | 0.972793   | 1.10674    | -6.14173  | -6.33315  | -5.97301     |
| test2 | 0.149442 | 0.932111  | 0.496716   | 1.367505   | -3.18885  | -3.25285  | -3.11186     |
| test3 | 0.045682 | 0.976146  | 0.838807   | 1.113485   | -0.04301  | -0.25405  | 0.159531     |
| test4 | 0.000113 | 1.071633  | 0.747364   | 1.395902   | -3.04974  | -3.27513  | -2.64511     |
