# Supplementary material for: CosinorPy: a python package for cosinor-based rhythmometry
Source: PubMed Central journal article supplement (PMC7597035; doi:10.1186/s12859-020-03830-w), 2020-10-29
Supplement: 12859_2020_3830_MOESM10_ESM.pdf [file 12859_2020_3830_MOESM10_ESM.pdf]

| test         | amplitude | amplitude | p_d_ampli | acrophase | acrophase | p_d_acrophase |
|--------------|-----------|-----------|-----------|-----------|-----------|---------------|
| test1 vs. te | 1.039766  | 0.932111  | 0.26892   | -6.14173  | -3.18885  | 1.82E-05      |
| test3 vs. te | 0.976146  | 1.071633  | 0.544973  | -0.04301  | -3.04974  | 0.00012       |
